# Supplementary material for: Pan-Bcl-2 inhibitor Obatoclax is a potent late stage autophagy inhibitor in colorectal cancer cells independent of canonical autophagy signaling
Source: PubMed Central journal article supplement (PMC4653869; doi:10.1186/s12885-015-1929-y), 2015-11-19

Fig. S2

AO unprotonated

AO protonated

merge

control

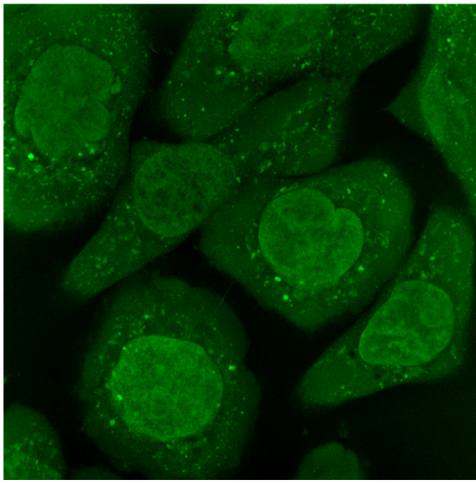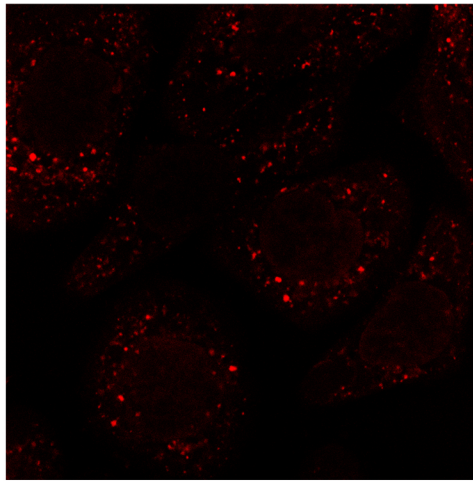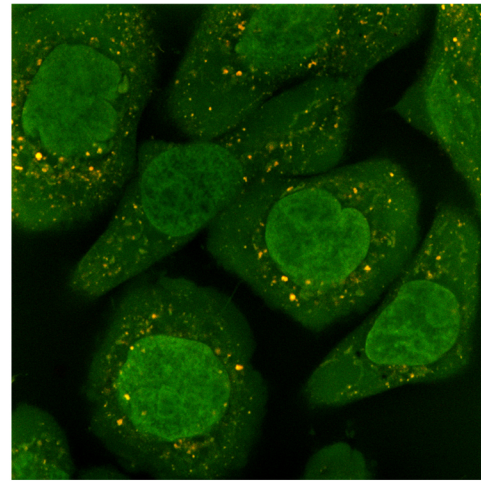

Chloroquine 30 $\mu$ M

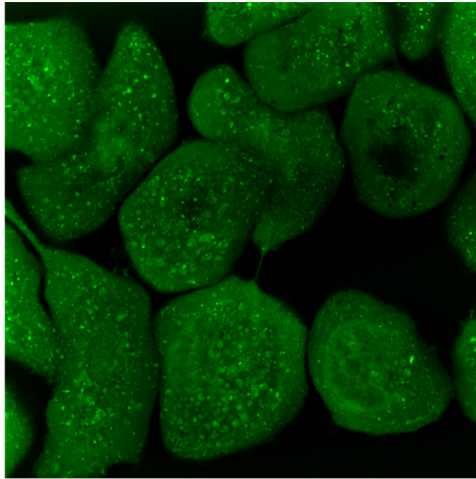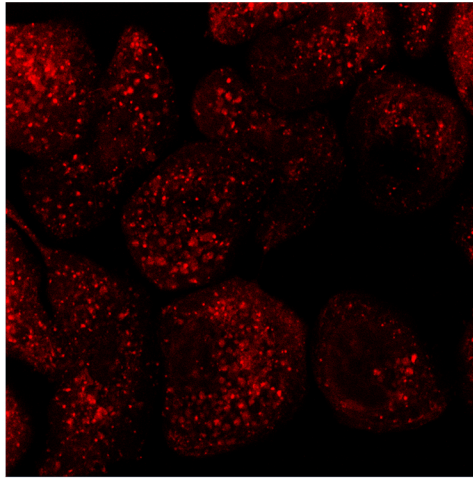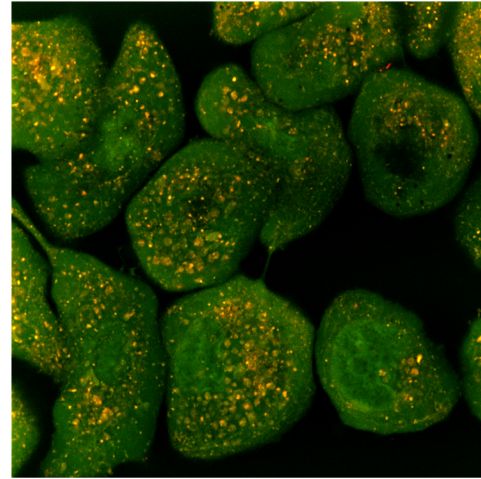

Obatoclox 0.25  $\mu$ M

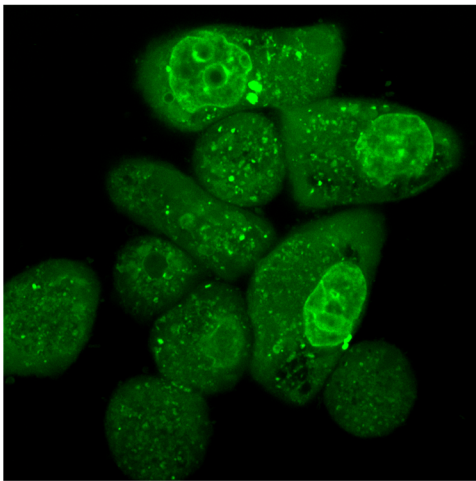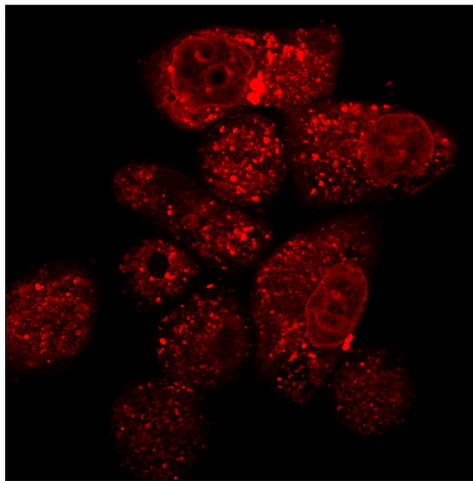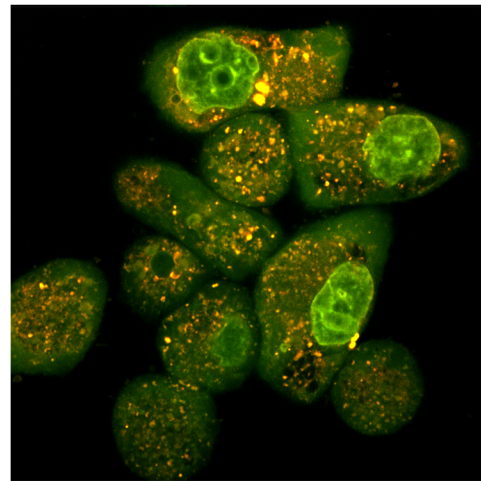

Supplement: 12885_2015_1929_MOESM2_ESM.pdf [file 12885_2015_1929_MOESM2_ESM.pdf]
